## 24 Abstract

25 Nascent public health research has identified linkages between sanitation experiences and mental health. The  
26 present study examined associations between sanitation-related empowerment resources (Bodily Integrity, Safety and  
27 Security, Privacy, and Time) and mental health outcomes (well-being, depression, and anxiety).

28 We conducted a secondary analysis of cross-sectional data collected in 2021-2022 from household surveys of  
29 women in Bangladesh, India, Senegal, and Uganda (n = 2,122). The primary exposures were sanitation-related  
30 empowerment resources measured using the Agency, Resources, and Institutional Structures for Sanitation-related  
31 Empowerment (ARISE) Scales. Three outcomes were assessed: subjective well-being (World Health Organization Well-being  
32 Index, WHO-5), anxiety (General Anxiety Disorder measure, GAD-2), and depression (Patient Health Questionnaire, PHQ-2).  
33 Linear regressions of the WHO-5, PHQ-2, and GAD-2 scores on the four sanitation-related empowerment resources were  
34 conducted.

35 Overall mean scores for well-being were moderate, and overall mean scores for anxiety and depression indicated  
36 normal prevalence (well-being mean = 17.2, SD = 5.8, depression mean = 1.1, SD = 1.4; anxiety mean = 1.0, SD = 1.4). In the  
37 adjusted well-being model, there was a positive association between Privacy and well-being ( $\beta = 2.0$ ,  $p < .001$ ). In the  
38 adjusted depression model, there were negative associations between Bodily Integrity and depression ( $\beta = -0.3$ ,  $p = .002$ )  
39 and between Privacy and depression ( $\beta = -0.4$ ,  $p < .001$ ). In the adjusted anxiety model, there were negative associations  
40 between all four resources and anxiety (Bodily Integrity  $\beta = -0.7$ ,  $p < .001$ ; Safety and Security  $\beta = -0.3$ ,  $p = .025$ ; Privacy  $\beta = -$   
41  $0.3$ ,  $p = .037$ ; Time  $\beta = -0.2$ ,  $p = .009$ ).

42 Our findings provide evidence of associations between women's sanitation-related resources of Bodily Integrity,  
43 Safety and Security, Privacy, and Time and mental health. Sanitation initiatives should aim to enhance and evaluate  
44 women's experiences of these resources given their potential to benefit women's mental health and well-being.

45

## 46 **1 Introduction**

47 Sanitation is a human right and is considered essential for preventing infectious diseases and contributing to  
48 mental and social well-being [1, 2]. Despite the critical role of sanitation for human health, 3.5 billion people still lack access  
49 to safely managed sanitation, including an estimated 419 million who practice open defecation [3]. While the World Health  
50 Organization (WHO) acknowledges the importance of sanitation on mental and social well-being, most research to date has  
51 focused on infectious disease outcomes, including understanding the burden of poor sanitation on various infectious  
52 diseases and related sequelae, like stunting, and determining what interventions are most effective at preventing diarrheal  
53 disease [4, 5]. There is also a growing understanding that inadequate sanitation can pose broader risks to women's health in  
54 particular, including maternal mortality, gender-based violence and harassment, and unmet menstrual health needs [6-11].  
55 As a result, there has been a call for more research on non-infectious disease outcomes, including mental health and  
56 general well-being, to more comprehensively understand how sanitation can impact health [12].

57 A small but growing body of research has identified linkages between negative sanitation experiences and adverse  
58 mental health outcomes. A systematic review and qualitative synthesis investigating how sanitation influences mental  
59 health found that an absence of sanitation-related privacy and safety negatively influenced well-being [13]. Specifically,  
60 women reported feeling anxiety when they perceived that they were exposed or were at risk of verbal, physical, or sexual  
61 assault. Qualitative studies have documented that sanitation-related conditions, like the physical environment (e.g.,  
62 barriers to access), social restrictions and conflict, and sexual violence are related to women's psychosocial stress [14-16].  
63 Additionally, a quantitative study conducted with women in rural Odisha, India found women's negative experiences and  
64 concerns, or 'sanitation insecurity,' to be associated with depression, anxiety, and poor well-being [17]. Notably, these  
65 associations were present even when women had access to a functional household latrine. This assessment was carried out  
66 using a measure of 'sanitation insecurity' that was created for the population engaged in rural Odisha, limiting  
67 comparability across other settings. Taken together, these findings provide an important foundation for understanding how  
68 women's sanitation experiences can influence mental health. However, further research is needed, particularly quantitative  
69 research that investigates sanitation experiences across diverse populations.

70 Research and practice are also increasingly seeking to understand the connection between sanitation and  
71 women's empowerment [18]. Empowerment is widely acknowledged to be a complex and multi-dimensional construct, and

72 the ‘resources’ dimension of empowerment may be most relevant to research on sanitation and mental health [18]. In the  
73 women’s empowerment literature, Kabeer defined resources as, “not only access, but also future claims, to both material  
74 and human and social resources” [19]. Similarly, the KIT Institute’s (KIT) conceptual framework of women’s empowerment  
75 defines resources as the, “tangible and intangible capital and sources of power that women and girls have, own or use  
76 individually or collectively in the exercise of agency” [20]. The framework includes three main types of resources that are  
77 central to women’s and girls’ empowerment: Critical Consciousness, Assets (includes Social Capital, Knowledge and Skills,  
78 Time, Financial and Productive Assets), and Bodily Integrity (includes Health, Safety and Security). A recent systematic  
79 review leveraged and adapted the KIT framework to understand how sanitation research has engaged empowerment and  
80 related domains and sub-domains [18]. From the review, the resources sub-domains of Bodily Integrity, Safety and Security,  
81 Privacy, and Time were the most amenable to programmatic change and seemed to have the most potential to be linked to  
82 mental health outcomes [18].

83 The literature suggests several ways in which sanitation-related bodily integrity, safety and security, privacy, and  
84 time may influence women’s mental health. For bodily integrity, which includes women’s choices and control over their  
85 bodies, studies have found that women restricted food and water and suppressed urination and defecation because of poor  
86 sanitation conditions, contributing to stress [10]. Similarly, women have reported a lack of sanitation-related privacy and  
87 safety, especially when openly defecating, as a source of anxiety, fear, and shame [10, 14, 15, 21-23]. Women have also  
88 reported feeling worried when they have had limited time for their sanitation needs and responsibilities [10, 14]. While  
89 sanitation-related bodily integrity, privacy, safety and security, and time are relevant to women’s mental health and well-  
90 being, there is limited quantitative research that demonstrates associations between these resources and mental health  
91 outcomes [17, 24].

92 This study aimed to investigate how sanitation-related resources – Bodily Integrity, Safety and Security, Privacy,  
93 and Time – are associated with key mental health outcomes (well-being, depression, and anxiety).

## 94 **2 Methods**

### 95 **2.1 Study design**

96 We conducted a secondary analysis of cross-sectional data collected for the Measuring Urban Sanitation and  
97 Empowerment (MUSE) project, which aimed to develop and validate measures of women’s sanitation-related

98 empowerment in urban areas of low- and middle-income countries (LMICs) [25]. Surveys were conducted with women in  
99 eight cities across five countries in Asia and Africa: Meherpur and Saidpur, Bangladesh; Narsapur, Tiruchirappalli, and  
100 Warangal, India; Dakar, Senegal; Kampala, Uganda; and Lusaka, Zambia. Data collection occurred between 12/08/2021 and  
101 20/05/2022 (Meherpur: 21/03/2022 - 09/04/2022; Saidpur: 21/03/2022 - 08/04/2022; Narsapur: 30/09/2021 - 25/11/2021;  
102 Tiruchirappalli: 10/03/2022 - 21/04/2022; Warangal: 12/08/2021 - 09/09/2021; Dakar: 11/04/2022 - 20/05/2022; Kampala:  
103 11/04/2022 - 12/05/2022; Lusaka: 21/10/2021 - 18/11/2021). Further details about the study design were described in the  
104 MUSE protocol [25].

## 105 **2.2 Participants and procedures**

106 The study's eight cities were purposively selected because of their partnership with the Citywide Inclusive  
107 Sanitation (CWIS) program. Neighborhoods in each city were also purposively selected in collaboration with CWIS partners  
108 and local officials, except in Bangladesh, where neighborhoods were randomly selected from a sampling frame of all  
109 neighborhoods in the two cities. A random walk technique was used to select households from within each neighborhood  
110 and an adult woman was recruited from each selected household. In-person surveys were implemented by trained female  
111 enumerators who were fluent in the local languages of each location. Surveys were conducted with 5,744 women (720 in  
112 Meherpur, 730 in Saidpur, 720 in Narsapur, 735 in Tiruchirappalli, 703 in Warangal, 709 in Dakar, 713 in Kampala, and 715  
113 in Lusaka). Further information on participants and procedures is provided elsewhere [25, 26].

## 114 **2.3 Measures**

### 115 **2.3.1 Outcomes**

116 We selected three outcomes – subjective mental well-being, depression, and anxiety – to assess different  
117 components of mental health. Scores for each outcome were calculated based on the measures' guidelines, which note  
118 that scores should be used for screening and not diagnosis.

119 We used the WHO Well-being Index (WHO-5) to measure subjective mental well-being. The measure has five  
120 statements (e.g., my daily life has been filled with things that interest me) with response options that range from 0 ('At no  
121 time') to 5 ('All of the time'). Summed scores range can range from 0-25, with lower scores indicating poorer well-being [27].

122 We used the two-item Patient Health Questionnaire (PHQ-2) to assess depression [28]. The PHQ-2 asks the  
 123 frequency over the last two weeks of feeling ‘little interest or pleasure in doing things’ and ‘feeling down, depressed, or  
 124 hopeless,’ with response options ranging from 0 (‘Not at all’) to 3 (‘Nearly every day’). The summed score can range from 0-  
 125 6 from normal to severe depression; a score of 3 or more indicates that major depressive disorder is likely [28].

126 We used the two-item Generalized Anxiety Disorder (GAD-2) measure to assess anxiety [29]. The GAD-2 includes  
 127 two items that ask the past two-week frequency of ‘feeling nervous, anxious, or on edge’ and ‘not being able to stop or  
 128 control worrying.’ Response options range from 0 (‘Not at all’) to 3 (‘Nearly every day’). The summed score can range from  
 129 0-6 from normal to severe anxiety, and a score of 3 or more indicates that anxiety disorder is likely [29, 30].

### 130 2.3.2 Exposures

131 The four primary exposures were sanitation-related empowerment resources – Bodily Integrity, Safety and  
 132 Security, Privacy, and Time – which were measured using the validated Agency, Resources, and Institutional Structures for  
 133 Sanitation-related Empowerment (ARISE) Scales [26]. ARISE definitions of Bodily Integrity, Safety and Security, Privacy, and  
 134 Time can be found in **Table 1**. Resources scale scores were calculated as a simple, unweighted average of all items in each  
 135 scale. The average scale scores can range from 0 to 4, with higher scores indicating greater sanitation-related  
 136 empowerment resources [31].

137  
 138 **Table 1.** ARISE Scale definitions for Bodily Integrity, Safety and Security, Privacy, and Time

| Scale <sup>1</sup>  | Definition <sup>2</sup>                                                                                                                                                                                                              | Factors & items in scale | Response options                                                                                                       | Score interpretation                                                                                                                |
|---------------------|--------------------------------------------------------------------------------------------------------------------------------------------------------------------------------------------------------------------------------------|--------------------------|------------------------------------------------------------------------------------------------------------------------|-------------------------------------------------------------------------------------------------------------------------------------|
| Bodily Integrity    | Women's control over their bodies and ability to access and use their preferred sanitation location                                                                                                                                  | 2 factors;<br>8 items    | 1 (Never) to<br>4 (Always)                                                                                             | Higher scores indicate women have more frequent satisfaction with sanitation location and less frequent withholding and suppression |
| Safety and Security | Women's freedom from acts or threats of violence (physical or sexual), coercion, harassment, or force when accessing and using sanitation locations or engaging in sanitation-related decision-making processes in the public sphere | 5 factors;<br>18 items   | 1 (Strongly Disagree) to<br>4 (Strongly Agree)<br>(For 3 factors)<br><br>1 (Never) to<br>4 (Always)<br>(For 2 factors) | Higher scores indicate women have lower perception of personal and other women's risk of sanitation-related harm                    |
| Privacy             | Women's ability to maintain desired levels of privacy when accessing and                                                                                                                                                             | 1 factor;<br>5 items     | 1 (Never) to<br>4 (Always)                                                                                             | Higher scores indicate that women have greater privacy for                                                                          |

|      | utilizing sanitation locations                                                             |                       |                                                   | sanitation                                                                                                               |
|------|--------------------------------------------------------------------------------------------|-----------------------|---------------------------------------------------|--------------------------------------------------------------------------------------------------------------------------|
| Time | Women's control over their time and labor spent on sanitation-related tasks and activities | 2 factors;<br>6 items | 1 (Strongly Disagree)<br>to<br>4 (Strongly Agree) | Higher scores indicate women have lower perceptions of sanitation needs and responsibilities as a burden on women's time |

<sup>1</sup> All scales include reverse-coded items

<sup>2</sup> Sanitation location is inclusive of sanitation facilities and open defecation

139

### 140 2.3.3 Covariates

141 We made a priori decisions to include the following individual-level characteristics as covariates, based on theory  
142 and literature: life stage, self-rated physical health, highest level of completed schooling, and perceived social support [17,  
143 32-37]. Four life stage categories were defined based on age and marital status: 1 ('Unmarried, age 49 and younger'), 2  
144 ('Married under three years'), 3 ('Married three years or more, age 49 and younger'), and 4 ('Over 49 years of age, any  
145 marital status')[32]. Self-rated physical health was measured by one question from the PROMIS global health subscale,  
146 which asks, "In general, how would you rate your physical health?" with response options ranging from 1 ('Poor') to 5  
147 ('Excellent')[35]. Education completed (categorized as 'primary or less', 'secondary', and 'post-secondary') was used as a  
148 proxy for wealth [36, 37]. We assessed social support with the Multidimensional Scale for Perceived Social Support (MSPSS)  
149 [33]. This 12-item scale measures perceived social support from family, friends, and significant others [33]. We used the 8  
150 items representing family and friends, as unmarried women were less likely to have a significant other [34]. Response  
151 options range from 0 ('Completely Disagree') to 4 ('Completely Agree'), and the mean score can range from 0 to 4, with  
152 higher scores indicating greater perceived social support.

153 We also included sanitation environment characteristics as binary covariates: latrine sharing status ('unshared' or  
154 'shared'), lockable latrine, lighting along the way to latrine, lighting inside latrine, and physically challenging to access or use  
155 latrine [10, 14, 15].

### 156 2.4 Data Management and Analysis

157 We constructed an analytic dataset by pooling the data from Meherpur, Saidpur, Tiruchirappalli, Dakar, and  
158 Kampala. We excluded observations from Narsapur, Warangal, and Lusaka, because data were not collected in those three  
159 cities for Bodily Integrity. As noted above, we calculated scale scores for each of the four sub-domains of sanitation-related

160 resources using all items in each scale; therefore, any observations with missing data for any item(s) within a scale were  
161 dropped. Additionally, the analytic sample for anxiety excluded observations from Dakar and Kampala because data were  
162 not collected in those two cities for the Multidimensional Scale of Perceived Social Support. Social support was included as  
163 a covariate in the anxiety model, because it was associated with anxiety in the pooled three-city model (Meherpur, Saidpur,  
164 Tiruchirappalli); however, social support was excluded as a covariate in the well-being and depression models, because it  
165 was not associated with either mental health outcome in the pooled three-city models.

166 Using the final analytic sample of all survey respondents with complete data (n = 2,122), we calculated univariate  
167 descriptive statistics for all study variables included in the analysis and then investigated associations between sanitation-  
168 related empowerment resources and mental health outcomes. We ran linear regressions of the WHO-5, PHQ-2, and GAD-2  
169 scores on the four resources (Bodily Integrity, Safety and Security, Privacy, and Time) to calculate  $\beta$  coefficients. We used  
170 continuous outcome scale scores (vs. cut-off categorical scores) because we were interested in participant mental health  
171 beyond screening thresholds. For each regression analysis, we ran unadjusted and adjusted pooled models. Unadjusted  
172 models included the sanitation-related empowerment resources. Adjusted models included the sanitation-related  
173 empowerment resources, along with individual characteristics covariates and sanitation environment covariates. All models  
174 controlled for city and adjusted for neighborhood-level clustering. Individual city models are included in the **S2-S14 Tables**.

175 We used Stata (version 18.0) for all analyses.

## 176 **2.5 Ethics statement**

177 Study protocols were reviewed and approved by ethics review committees in each site: Emory University in Atlanta,  
178 USA (IRB00110271), Makerere University in Kampala, Uganda (MAK-SHSREC Ref No. 2019-038), Comité National d’Ethique  
179 pour la Recherche en Santé in Dakar, Senegal (SEN21/85), International Institute of Health Management Research in New  
180 Delhi, India (IRB/2020-2021/001), and International Training Network-Bangladesh University of Engineering and Technology  
181 in Dhaka, Bangladesh (1.003/2022/02). Participants in all cities received compensation (either cash or in-kind) in accordance  
182 with local policies and ethical requirements. All women provided informed consent (written: Kampala, Dakar,  
183 Tiruchirappalli; verbal: Meherpur, Saidpur) before participation in the study, and verbal consent was witnessed and  
184 documented by enumerators.



## 185 3 Results

### 186 3.1 Sample size and socio-demographic characteristics

187 The analytic sample included 2,122 participants with a mean age of 35 years (SD = 11.5), and included 414  
 188 unmarried women (20%), 83 women married under three years (4%), 1,407 women married three years or more (66%), and  
 189 218 over age 49 with any marital status (10%). The largest proportion (49%) reported completing secondary school, 36%  
 190 reported completing primary or less, and 15% reported completing post-secondary. The mean social support score was 3.1  
 191 (SD = 0.7), indicating high family and friend social support. A majority of the participants (71%) reported 'good', 'very good',  
 192 or 'excellent' physical health. For sanitation environment, 69% reported having an unshared latrine, 92% reported being  
 193 able to lock their latrine from the inside, 86% reported sufficient lighting inside their latrine, 93% reported sufficient lighting  
 194 along the way to their latrine, and 10% reported that they experienced physical challenges with using their latrine (Table 2).  
 195

**Table 2. Demographic and sanitation environment characteristics of women respondents, by city (n = 2,122)**

|                                                  | City     |      |         |      |                 |      |       |      |         |      |       |       |
|--------------------------------------------------|----------|------|---------|------|-----------------|------|-------|------|---------|------|-------|-------|
|                                                  | Meherpur |      | Saidpur |      | Tiruchirappalli |      | Dakar |      | Kampala |      | Total |       |
|                                                  | 390      | 390  | 659     | 659  | 304             | 304  | 260   | 260  | 509     | 509  | 2,122 | 2,122 |
| <b>Age mean, SD</b>                              | 34.6     | 9.8  | 32.3    | 9.2  | 33.2            | 8.4  | 44.2  | 15.7 | 34.0    | 12.2 | 34.7  | 11.5  |
| <b>Social support score<sup>1</sup> mean, SD</b> | 2.9      | 0.6  | 3.1     | 0.6  | 3.2             | 0.9  | .     | .    | .       | .    | 3.1   | 0.7   |
| <b>Life stage n, %</b>                           |          |      |         |      |                 |      |       |      |         |      |       |       |
| Unmarried, age 49 and younger                    | 8        | 2.1  | 75      | 11.4 | 39              | 12.8 | 34    | 13.1 | 258     | 50.7 | 414   | 19.5  |
| Married under 3 years                            | 14       | 3.6  | 31      | 4.7  | 15              | 4.9  | 5     | 1.9  | 18      | 3.5  | 83    | 3.9   |
| Married 3 years or more, age 49 and younger      | 337      | 86.4 | 519     | 78.8 | 246             | 80.9 | 127   | 48.8 | 178     | 35.0 | 1407  | 66.3  |
| Over 49 years, any marital status                | 31       | 7.9  | 34      | 5.2  | 4               | 1.3  | 94    | 36.2 | 55      | 10.8 | 218   | 10.3  |
| <b>Completed schooling n, %</b>                  |          |      |         |      |                 |      |       |      |         |      |       |       |
| Primary or less                                  | 111      | 28.5 | 224     | 34.0 | 68              | 22.4 | 164   | 63.1 | 201     | 39.5 | 768   | 36.2  |
| Secondary                                        | 228      | 58.5 | 371     | 56.3 | 136             | 44.7 | 68    | 26.2 | 233     | 45.8 | 1036  | 48.8  |
| Post-Secondary                                   | 51       | 13.1 | 64      | 9.7  | 100             | 32.9 | 28    | 10.8 | 75      | 14.7 | 318   | 15.0  |
| <b>Self-rated physical health n, %</b>           |          |      |         |      |                 |      |       |      |         |      |       |       |
| Poor                                             | 9        | 2.3  | 5       | 0.8  | 4               | 1.3  | 9     | 3.5  | 19      | 3.7  | 46    | 2.2   |
| Fair                                             | 149      | 38.2 | 291     | 44.2 | 22              | 7.2  | 60    | 23.1 | 49      | 9.6  | 571   | 26.9  |
| Good                                             | 171      | 43.8 | 230     | 34.9 | 127             | 41.8 | 134   | 51.5 | 173     | 34.0 | 835   | 39.3  |
| Very good                                        | 54       | 13.8 | 108     | 16.4 | 69              | 22.7 | 53    | 20.4 | 218     | 42.8 | 502   | 23.7  |
| Excellent                                        | 7        | 1.8  | 25      | 3.8  | 82              | 27.0 | 4     | 1.5  | 50      | 9.8  | 168   | 7.9   |
| <b>Latrine sharing status n, %</b>               |          |      |         |      |                 |      |       |      |         |      |       |       |

|                                                      |     |      |     |      |     |      |     |      |     |      |      |      |
|------------------------------------------------------|-----|------|-----|------|-----|------|-----|------|-----|------|------|------|
| Shared                                               | 63  | 16.2 | 49  | 7.4  | 68  | 22.4 | 76  | 29.2 | 395 | 77.6 | 651  | 30.7 |
| Unshared                                             | 327 | 83.8 | 610 | 92.6 | 236 | 77.6 | 184 | 70.8 | 114 | 22.4 | 1471 | 69.3 |
| <b>Latrine is lockable from inside n, %</b>          |     |      |     |      |     |      |     |      |     |      |      |      |
| Yes                                                  | 332 | 85.1 | 636 | 96.5 | 294 | 96.7 | 243 | 93.5 | 441 | 86.6 | 1946 | 91.7 |
| No                                                   | 58  | 14.9 | 23  | 3.5  | 10  | 3.3  | 17  | 6.5  | 68  | 13.4 | 176  | 8.3  |
| <b>Sufficient lighting inside latrine n, %</b>       |     |      |     |      |     |      |     |      |     |      |      |      |
| Yes                                                  | 351 | 90.0 | 633 | 96.1 | 296 | 97.4 | 241 | 92.7 | 302 | 59.3 | 1823 | 85.9 |
| No                                                   | 39  | 10.0 | 26  | 3.9  | 8   | 2.6  | 19  | 7.3  | 207 | 40.7 | 299  | 14.1 |
| <b>Sufficient lighting along way to latrine n, %</b> |     |      |     |      |     |      |     |      |     |      |      |      |
| Yes                                                  | 380 | 97.4 | 643 | 97.6 | 301 | 99.0 | 235 | 90.4 | 408 | 80.2 | 1967 | 92.7 |
| No                                                   | 10  | 2.6  | 16  | 2.4  | 3   | 1.0  | 25  | 9.6  | 101 | 19.8 | 155  | 7.3  |
| <b>Physically challenging to use latrine n, %</b>    |     |      |     |      |     |      |     |      |     |      |      |      |
| Yes                                                  | 43  | 11.0 | 9   | 1.4  | 85  | 28.0 | 9   | 3.5  | 69  | 13.6 | 215  | 10.1 |
| No                                                   | 347 | 89.0 | 650 | 98.6 | 219 | 72.0 | 251 | 96.5 | 440 | 86.4 | 1907 | 89.9 |

<sup>1</sup> Multidimensional Scale of Perceived Social Support data were not collected in Dakar and Kampala

## 196 3.2 Scores for well-being, depression, and anxiety

197 The overall mean scores for mental well-being were above the threshold of 13, indicating better well-being (mean  
 198 = 17.2, SD = 5.8), though 19% (412) had well-being scores below 13, indicating poor well-being (**Fig 1 and Table 3**). The  
 199 overall mean scores for anxiety and depression were below the threshold of 3, indicating lower frequency of experiencing  
 200 symptoms of both outcomes (depression mean = 1.1, SD = 1.4; anxiety mean = 1.0, SD = 1.4); however, 17% (356) had  
 201 depression scores of 3 or more, indicating major depression disorder was likely and 12% (257) had anxiety scores of 3 or  
 202 more, indicating anxiety disorder was likely (**Fig 1 and Table 3**). Well-being scores were moderately negatively correlated  
 203 with anxiety and depression scores, and anxiety and depression scores were strongly positively correlated (**S1 Table**).

204

205 **Fig 1. Boxplots of mental health outcome scores (well-being, depression, and anxiety), by city**

206

**Table 3. Mental health outcome scores (well-being, depression, and anxiety), by city**

| Mental Health Outcome                | City     |         |                 |       |         |      | Total       |      |      |      |      |      |
|--------------------------------------|----------|---------|-----------------|-------|---------|------|-------------|------|------|------|------|------|
|                                      | Meherpur | Saidpur | Tiruchirappalli | Dakar | Kampala |      |             |      |      |      |      |      |
| WHO-5 well-being score               |          |         |                 |       |         |      |             |      |      |      |      |      |
| N                                    | 390      | 659     | 304             | 260   | 509     |      | <b>2122</b> |      |      |      |      |      |
| Mean, SD                             | 15.8     | 5.7     | 17.9            | 4.5   | 15      | 7.9  | 17.7        | 5.7  | 18.4 | 5.4  | 17.2 | 5.8  |
| N, Proportion < 13 (poor well-being) | 113      | 29.0    | 76              | 11.5  | 97      | 31.9 | 48          | 18.5 | 78   | 15.3 | 412  | 19.4 |

PHQ-2 depression score

|                                                           |     |      |     |     |     |      |     |     |     |      |             |      |
|-----------------------------------------------------------|-----|------|-----|-----|-----|------|-----|-----|-----|------|-------------|------|
| N                                                         | 390 |      | 659 |     | 304 |      | 260 |     | 509 |      | <b>2122</b> |      |
| Mean, SD                                                  | 1.5 | 1.6  | 0.7 | 1.0 | 2.2 | 1.3  | 0.3 | 0.8 | 1.3 | 1.5  | 1.1         | 1.4  |
| N, Proportion $\geq 3$ (major depressive disorder likely) | 87  | 22.3 | 37  | 5.6 | 141 | 46.4 | 9   | 3.5 | 82  | 16.1 | 356         | 16.8 |

GAD-2 anxiety score

|                                                  |     |      |     |     |     |      |     |     |     |      |             |      |
|--------------------------------------------------|-----|------|-----|-----|-----|------|-----|-----|-----|------|-------------|------|
| N                                                | 390 |      | 659 |     | 304 |      | 260 |     | 509 |      | <b>2122</b> |      |
| Mean, SD                                         | 1.5 | 1.6  | 0.6 | 1.0 | 1.1 | 1.4  | 0.6 | 0.8 | 1.3 | 1.5  | 1.0         | 1.4  |
| N, Proportion $\geq 3$ (anxiety disorder likely) | 82  | 21.0 | 31  | 4.7 | 47  | 15.5 | 9   | 3.5 | 88  | 17.3 | 257         | 12.1 |

207

208 **3.3 Scores for sanitation-related Bodily Integrity, Safety and Security,**

209 **Privacy, and Time**

210 The overall scores for Bodily Integrity, Safety and Security, and Privacy were high and the overall score for Time  
 211 was moderately high (Bodily Integrity mean = 3.7, SD = 0.4; Safety and Security mean = 3.5, SD = 0.4; Privacy mean = 3.8, SD  
 212 = 0.5; Time mean = 3.2, SD = 0.5) (Table 4).

213

**Table 4. Sanitation-related empowerment resources scores of women respondents, by city**

| Resources           | City     |      |     |         |      |     |                 |      |     |       |      |     |         |      |     |             |      |     |
|---------------------|----------|------|-----|---------|------|-----|-----------------|------|-----|-------|------|-----|---------|------|-----|-------------|------|-----|
|                     | Meherpur |      |     | Saidpur |      |     | Tiruchirappalli |      |     | Dakar |      |     | Kampala |      |     | Total       |      |     |
|                     | N        | mean | SD  | N       | mean | SD  | N               | mean | SD  | N     | mean | SD  | N       | mean | SD  | N           | mean | SD  |
| Bodily Integrity    | 390      | 3.7  | 0.4 | 659     | 3.9  | 0.2 | 304             | 3.8  | 0.3 | 260   | 3.7  | 0.4 | 509     | 3.5  | 0.4 | <b>2122</b> | 3.7  | 0.4 |
| Safety and Security | 390      | 3.5  | 0.4 | 659     | 3.7  | 0.3 | 304             | 3.4  | 0.4 | 260   | 3.5  | 0.3 | 509     | 3.5  | 0.4 | <b>2122</b> | 3.5  | 0.4 |
| Privacy             | 390      | 3.4  | 0.9 | 659     | 3.9  | 0.2 | 304             | 3.8  | 0.4 | 260   | 3.9  | 0.3 | 509     | 3.7  | 0.4 | <b>2122</b> | 3.8  | 0.5 |
| Time                | 390      | 3.1  | 0.5 | 659     | 3.2  | 0.5 | 304             | 3.1  | 0.5 | 260   | 2.8  | 0.5 | 509     | 3.4  | 0.5 | <b>2122</b> | 3.2  | 0.5 |

214

215 **3.4 Regression results**

216 We found that higher scores for each of the four sub-domains of sanitation-related resources were associated with  
 217 higher scores for well-being and lower scores for depression and anxiety. Individual city models were more mixed in their  
 218 associations between the resources and mental health outcomes.

219 **3.4.1 Well-being**

220 In the pooled adjusted well-being model, there was a positive association between Privacy and well-being ( $\beta = 2.0$ ,  
 221  $p < .001$ ), indicating that for each one-point increase in sanitation-related Privacy, well-being scores increased by two points.  
 222 Well-being was not associated with Bodily Integrity ( $\beta = 0.9$ ,  $p = .147$ ), Safety and Security ( $\beta = 0.0$ ,  $p = .964$ ), or Time ( $\beta = 0.9$ ,  
 223  $p = .084$ ) (Table 5).  
 224

Table 5. Association between sanitation-related empowerment resources sub-domains and well-being (WHO-5), in the pooled sample

| Parameter                                                              | Sanitation-related empowerment resources |      |          |         | Sanitation-related empowerment resources + individual characteristics + sanitation environment + city |      |           |         |
|------------------------------------------------------------------------|------------------------------------------|------|----------|---------|-------------------------------------------------------------------------------------------------------|------|-----------|---------|
|                                                                        | Model 1   Unadjusted                     |      |          |         | Model 2   Adjusted                                                                                    |      |           |         |
|                                                                        | Estimate                                 | SE   | (95% CI) | p value | Estimate                                                                                              | SE   | (95% CI)  | p value |
| <b>Intercept</b>                                                       | 0.02                                     | 1.97 | -3.9 3.9 | 0.990   | 1.37                                                                                                  | 2.91 | -4.4 7.1  | 0.638   |
| <b>Sanitation-related empowerment sub-domains</b>                      |                                          |      |          |         |                                                                                                       |      |           |         |
| Bodily Integrity                                                       | <b>1.34</b>                              | 0.43 | 0.5 2.2  | 0.002   | <b>0.85</b>                                                                                           | 0.58 | -0.3 2.0  | 0.147   |
| Safety and Security                                                    | <b>0.38</b>                              | 0.63 | -0.9 1.6 | 0.548   | <b>0.03</b>                                                                                           | 0.71 | -1.4 1.4  | 0.964   |
| Privacy                                                                | <b>2.07</b>                              | 0.32 | 1.4 2.7  | <0.000  | <b>1.98</b>                                                                                           | 0.33 | 1.3 2.6   | <0.001  |
| Time                                                                   | <b>0.97</b>                              | 0.50 | 0.0 2.0  | 0.054   | <b>0.85</b>                                                                                           | 0.49 | -0.1 1.8  | 0.084   |
| <b>Life stage</b> (Stage 1: Unmarried, age 49 and younger as referent) |                                          |      |          |         |                                                                                                       |      |           |         |
| Stage 2: Married under 3 years                                         |                                          |      |          |         | -0.67                                                                                                 | 0.61 | -1.9 0.5  | 0.270   |
| Stage 3: Married 3 years or more, age 49 and younger                   |                                          |      |          |         | -1.41                                                                                                 | 0.34 | -2.1 -0.7 | <0.001  |
| Stage 4: Over 49 years, any marital status                             |                                          |      |          |         | -1.13                                                                                                 | 0.79 | -2.7 0.4  | 0.157   |
| <b>Education completed</b> (Primary or less as referent)               |                                          |      |          |         |                                                                                                       |      |           |         |
| Secondary                                                              |                                          |      |          |         | 0.48                                                                                                  | 0.32 | -0.2 1.1  | 0.140   |
| Post-secondary                                                         |                                          |      |          |         | 0.34                                                                                                  | 0.44 | -0.5 1.2  | 0.437   |
| <b>Self-rated physical health</b> (Poor health as referent)            |                                          |      |          |         |                                                                                                       |      |           |         |
| Fair                                                                   |                                          |      |          |         | 1.58                                                                                                  | 0.79 | 0.0 3.1   | 0.048   |
| Good                                                                   |                                          |      |          |         | 3.39                                                                                                  | 0.80 | 1.8 5.0   | <0.001  |
| Very good                                                              |                                          |      |          |         | 5.43                                                                                                  | 0.92 | 3.6 7.3   | <0.001  |
| Excellent                                                              |                                          |      |          |         | 3.60                                                                                                  | 1.30 | 1.0 6.2   | 0.007   |
| <b>City</b>                                                            |                                          |      |          |         | 0.21                                                                                                  | 0.07 | 0.1 0.3   | 0.002   |
| <b>Unshared latrine</b>                                                |                                          |      |          |         | -0.39                                                                                                 | 0.39 | -1.2 0.4  | 0.320   |
| <b>Latrine is lockable</b>                                             |                                          |      |          |         | -0.84                                                                                                 | 0.44 | -1.7 0.0  | 0.061   |
| <b>Sufficient latrine lighting inside latrine</b>                      |                                          |      |          |         | 0.51                                                                                                  | 0.40 | -0.3 1.3  | 0.204   |
| <b>Sufficient latrine lighting along way to latrine</b>                |                                          |      |          |         | -0.39                                                                                                 | 0.57 | -1.5 0.7  | 0.493   |
| <b>Physically challenging to access or use latrine</b>                 |                                          |      |          |         | -2.93                                                                                                 | 0.72 | -4.4 -1.5 | <0.001  |

Models are clustered by neighborhood ID  
 Participants = 2122, Neighborhoods = 102

225

226 For individual-level characteristics, there was a negative association between women who were married for three  
 227 years or more and their subjective well-being ( $\beta = -1.4$ ,  $p < .001$ ). Additionally, there were positive associations of self-rated  
 228 physical health categories (fair through excellent, compared to poor health as referent) and well-being. For sanitation  
 229 environment characteristics, there was a negative association between reporting physical challenges accessing or using  
 230 latrines and well-being ( $\beta = -2.9$ ,  $p < .001$ ) (Table 5).

231 In the individual city adjusted well-being models, we observed mixed associations between the four sub-domains  
 232 and well-being. There were positive associations in two cities between Bodily Integrity and well-being (Saidpur  $\beta = 5.1$ ,  
 233  $p < .001$ ; Dakar  $\beta = 3.9$ ,  $p = .011$ ), as well as between Time and well-being (Saidpur  $\beta = 1.4$ ,  $p = .022$ ; Tiruchirappalli  $\beta = 5.9$ ,  
 234  $p < .001$ ), but no associations between either Bodily Integrity or Time and well-being in the other cities. In contrast, for  
 235 Safety and Security, we observed a positive association with well-being in one city, Dakar ( $\beta = 5.0$ ,  $p = .008$ ), an inverse  
 236 association in another city, Tiruchirappalli ( $\beta = -8.1$ ,  $p < .001$ ), and no association in the remaining three cities. Similarly, for  
 237 Privacy, we observed positive associations in two cities (Meherpur  $\beta = 1.5$ ,  $p < .001$ ; Kampala  $\beta = 2.7$ ,  $p < .001$ ), an inverse  
 238 association in one city, Dakar ( $\beta = -3.6$ ,  $p < .001$ ), and no associations in the remaining two cities (S2-S6 Tables).

### 239 3.4.2 Depression

240 In the pooled adjusted depression model, there were negative associations between Bodily Integrity and  
 241 depression ( $\beta = -0.3$ ,  $p = .002$ ) and between Privacy and depression ( $\beta = -0.4$ ,  $p < .001$ ). Safety and Security was not associated  
 242 with depression ( $\beta = 0.1$ ,  $p = .578$ ), nor was Time ( $\beta = -0.1$ ,  $p = .110$ ) (Table 6).

243

Table 6. Association between sanitation-related empowerment resources sub-domains and depression (PHQ-2), in the pooled sample

| Parameter                                         | Sanitation-related empowerment resources |      |           |         | Sanitation-related empowerment resources + individual characteristics + sanitation environment + city |      |           |         |
|---------------------------------------------------|------------------------------------------|------|-----------|---------|-------------------------------------------------------------------------------------------------------|------|-----------|---------|
|                                                   | Model 1   Unadjusted                     |      |           |         | Model 2   Adjusted                                                                                    |      |           |         |
|                                                   | Estimate                                 | SE   | (95% CI)  | p value | Estimate                                                                                              | SE   | (95% CI)  | p value |
| Intercept                                         | 5.12                                     | 0.48 | 4.2 6.1   | <0.000  | 5.24                                                                                                  | 0.45 | 4.3 6.1   | <0.000  |
| <b>Sanitation-related empowerment sub-domains</b> |                                          |      |           |         |                                                                                                       |      |           |         |
| Bodily Integrity                                  | <b>-0.47</b>                             | 0.12 | -0.7 -0.2 | <0.000  | <b>-0.30</b>                                                                                          | 0.10 | -0.5 -0.1 | 0.002   |
| Safety and Security                               | <b>-0.22</b>                             | 0.10 | -0.4 0.0  | 0.028   | <b>0.06</b>                                                                                           | 0.11 | -0.2 0.3  | 0.578   |
| Privacy                                           | <b>-0.41</b>                             | 0.10 | -0.6 -0.2 | <0.000  | <b>-0.42</b>                                                                                          | 0.08 | -0.6 -0.3 | <0.001  |

|                                                                        |      |      |      |     |       |       |      |      |      |        |
|------------------------------------------------------------------------|------|------|------|-----|-------|-------|------|------|------|--------|
| Time                                                                   | 0.03 | 0.10 | -0.2 | 0.2 | 0.774 | -0.13 | 0.08 | -0.3 | 0.0  | 0.110  |
| <b>Life stage</b> (Stage 1: Unmarried, age 49 and younger as referent) |      |      |      |     |       |       |      |      |      |        |
| Stage 2: Married under 3 years                                         |      |      |      |     |       | 0.03  | 0.13 | -0.2 | 0.3  | 0.815  |
| Stage 3: Married 3 years or more, age 49 and younger                   |      |      |      |     |       | 0.17  | 0.08 | 0.0  | 0.3  | 0.026  |
| Stage 4: Over 49 years, any marital status                             |      |      |      |     |       | -0.30 | 0.14 | -0.6 | 0.0  | 0.030  |
| <b>Education completed</b> (Primary or less as referent)               |      |      |      |     |       |       |      |      |      |        |
| Secondary                                                              |      |      |      |     |       | 0.04  | 0.06 | -0.1 | 0.2  | 0.503  |
| Post-secondary                                                         |      |      |      |     |       | -0.02 | 0.09 | -0.2 | 0.2  | 0.841  |
| <b>Self-rated physical health</b> (Poor health as referent)            |      |      |      |     |       |       |      |      |      |        |
| Fair                                                                   |      |      |      |     |       | -0.46 | 0.22 | -0.9 | 0.0  | 0.036  |
| Good                                                                   |      |      |      |     |       | -0.99 | 0.23 | -1.4 | -0.5 | <0.001 |
| Very good                                                              |      |      |      |     |       | -1.41 | 0.25 | -1.9 | -0.9 | <0.001 |
| Excellent                                                              |      |      |      |     |       | -1.01 | 0.24 | -1.5 | -0.5 | <0.001 |
| <b>City</b>                                                            |      |      |      |     |       | -0.19 | 0.02 | -0.2 | -0.2 | <0.001 |
| <b>Unshared latrine</b>                                                |      |      |      |     |       | 0.21  | 0.08 | 0.0  | 0.4  | 0.012  |
| <b>Latrine is lockable</b>                                             |      |      |      |     |       | 0.07  | 0.12 | -0.2 | 0.3  | 0.552  |
| <b>Sufficient latrine lighting inside latrine</b>                      |      |      |      |     |       | 0.26  | 0.14 | 0.0  | 0.5  | 0.066  |
| <b>Sufficient latrine lighting along way to latrine</b>                |      |      |      |     |       | 0.13  | 0.16 | -0.2 | 0.4  | 0.426  |
| <b>Physically challenging to access or use latrine</b>                 |      |      |      |     |       | 0.49  | 0.15 | 0.2  | 0.8  | 0.002  |

Models are clustered by neighborhood ID  
 Participants = 2122, Neighborhoods = 102

244

245

246

247

248

249

250

251

252

253

254

255

256

257

258

For individual-level characteristics, there were mixed associations for life stage, with a positive association between ‘stage 3: married three years or more’ and depression ( $\beta = 0.2$ ,  $p=.026$ ) and a negative association between ‘stage 4: over 49 years old’ and depression ( $\beta = -0.3$ ,  $P=.030$ ). All self-rated physical health categories (fair through excellent, with poor health as referent) were negatively associated with depression. For sanitation environment characteristics, there was a positive association between having an unshared latrine and depression ( $\beta = 0.2$ ,  $p=.012$ ). Additionally, experiencing physical challenges to access or use a latrine was positively associated with depression scores ( $\beta = 0.5$ ,  $p=.002$ ) (**Table 6**).

In the individual city adjusted depression models, we observed fewer associations between the four sub-domains and depression, compared to the results for well-being, but the observed associations were more consistent in their directionality. Specifically, there were negative associations between three of the sanitation-related empowerment resources (Bodily Integrity, Privacy, Time) and depression (**S7-S11 Tables**). Bodily Integrity was negatively associated with depression in two of the five cities (Saidpur  $\beta = -1.1$ ,  $p<.001$ ; Dakar  $\beta = -0.3$ ,  $p=.005$ ). Similarly, Privacy was negatively associated with depression in two of the five cities (Dakar  $\beta = -0.9$ ,  $p=.003$ ; Kampala  $\beta = -0.8$ ,  $p=.001$ ). Time was negatively associated with depression in one city (Saidpur  $\beta = -0.4$ ,  $p=.002$ ). Safety and Security was not associated with depression in any of the five individual city models.

### 259 3.4.3 Anxiety

260 In the pooled adjusted anxiety model, there were negative associations between all four sanitation-related  
 261 empowerment resources and anxiety (Bodily Integrity  $\beta = -0.7$ ,  $p < .001$ ; Safety and Security  $\beta = -0.3$ ,  $p = .025$ ; Privacy  $\beta = -0.3$ ,  
 262  $p = .037$ ; Time  $\beta = -0.2$ ,  $p = .009$ ) (**Table 7**).

263

**Table 7.** Association between sanitation-related empowerment resources sub-domains and **anxiety (GAD-2)**, in the pooled sample

| Parameter                                                              | Sanitation-related empowerment resources |      |           |         | Sanitation-related empowerment resources + individual characteristics + sanitation environment + city |      |           |         |
|------------------------------------------------------------------------|------------------------------------------|------|-----------|---------|-------------------------------------------------------------------------------------------------------|------|-----------|---------|
|                                                                        | Model 1   Unadjusted                     |      |           |         | Model 2   Adjusted                                                                                    |      |           |         |
|                                                                        | Estimate                                 | SE   | (95% CI)  | p value | Estimate                                                                                              | SE   | (95% CI)  | p value |
| <b>Intercept</b>                                                       | 7.38                                     | 0.58 | 6.2 8.5   | <0.000  | 7.87                                                                                                  | 0.82 | 6.2 9.5   | <0.001  |
| <b>Sanitation-related empowerment sub-domains</b>                      |                                          |      |           |         |                                                                                                       |      |           |         |
| Bodily Integrity                                                       | <b>-0.88</b>                             | 0.15 | -1.2 -0.6 | <0.000  | <b>-0.67</b>                                                                                          | 0.15 | -1.0 -0.4 | <0.001  |
| Safety and security                                                    | <b>-0.35</b>                             | 0.14 | -0.6 -0.1 | 0.016   | <b>-0.33</b>                                                                                          | 0.14 | -0.6 0.0  | 0.025   |
| Privacy                                                                | <b>-0.24</b>                             | 0.14 | -0.5 0.0  | 0.081   | <b>-0.25</b>                                                                                          | 0.12 | -0.5 0.0  | 0.037   |
| Time                                                                   | <b>-0.28</b>                             | 0.08 | -0.4 -0.1 | <0.000  | <b>-0.23</b>                                                                                          | 0.08 | -0.4 -0.1 | 0.009   |
| <b>Life stage</b> (Stage 1: Unmarried, age 49 and younger as referent) |                                          |      |           |         |                                                                                                       |      |           |         |
| Stage 2: Married under 3 years                                         |                                          |      |           |         | 0.05                                                                                                  | 0.18 | -0.3 0.4  | 0.776   |
| Stage 3: Married 3 years or more, age 49 old and younger               |                                          |      |           |         | 0.18                                                                                                  | 0.10 | 0.0 0.4   | 0.075   |
| Stage 4: Over 49 years, any marital status                             |                                          |      |           |         | 0.49                                                                                                  | 0.21 | 0.1 0.9   | 0.024   |
| <b>Education completed</b> (Primary or less as referent)               |                                          |      |           |         |                                                                                                       |      |           |         |
| Secondary                                                              |                                          |      |           |         | 0.06                                                                                                  | 0.08 | -0.1 0.2  | 0.488   |
| Post-secondary                                                         |                                          |      |           |         | 0.02                                                                                                  | 0.10 | -0.2 0.2  | 0.863   |
| <b>Self-rated physical health</b> (Poor health as referent)            |                                          |      |           |         |                                                                                                       |      |           |         |
| Fair                                                                   |                                          |      |           |         | -0.86                                                                                                 | 0.41 | -1.7 -0.1 | 0.037   |
| Good                                                                   |                                          |      |           |         | -1.24                                                                                                 | 0.42 | -2.1 -0.4 | 0.004   |
| Very good                                                              |                                          |      |           |         | -1.56                                                                                                 | 0.44 | -2.4 -0.7 | 0.001   |
| Excellent                                                              |                                          |      |           |         | -1.53                                                                                                 | 0.43 | -2.4 -0.7 | 0.001   |
| <b>Social Support</b>                                                  |                                          |      |           |         |                                                                                                       |      |           |         |
|                                                                        |                                          |      |           |         | -0.24                                                                                                 | 0.07 | -0.4 -0.1 | 0.001   |
| <b>City</b>                                                            |                                          |      |           |         |                                                                                                       |      |           |         |
|                                                                        |                                          |      |           |         | -0.06                                                                                                 | 0.01 | -0.1 0.0  | <0.001  |
| <b>Unshared latrine</b>                                                |                                          |      |           |         |                                                                                                       |      |           |         |
|                                                                        |                                          |      |           |         | 0.13                                                                                                  | 0.12 | -0.1 0.4  | 0.259   |
| <b>Latrine is lockable</b>                                             |                                          |      |           |         |                                                                                                       |      |           |         |
|                                                                        |                                          |      |           |         | 0.30                                                                                                  | 0.16 | 0.0 0.6   | 0.077   |
| <b>Sufficient latrine lighting inside latrine</b>                      |                                          |      |           |         |                                                                                                       |      |           |         |
|                                                                        |                                          |      |           |         | 0.20                                                                                                  | 0.22 | -0.2 0.6  | 0.363   |
| <b>Sufficient latrine lighting along way to latrine</b>                |                                          |      |           |         |                                                                                                       |      |           |         |
|                                                                        |                                          |      |           |         | -0.07                                                                                                 | 0.28 | -0.6 0.5  | 0.808   |
| <b>Physically challenging to access or use latrine</b>                 |                                          |      |           |         |                                                                                                       |      |           |         |
|                                                                        |                                          |      |           |         | 0.41                                                                                                  | 0.16 | 0.1 0.7   | 0.012   |

Models are clustered by neighborhood ID  
 Participants = 1353, Neighborhood = 90

264

265 For individual-level characteristics, there was a positive association between life stage (stage 4: over 49 years old,  
266 any marital status) and anxiety ( $\beta = 0.5$ ,  $p = .024$ ). Additionally, self-rated physical health categories (fair through excellent,  
267 with poor health as referent) were negatively associated with anxiety, and social support scores were negatively associated  
268 with anxiety ( $\beta = -0.2$ ,  $p = .001$ ). For sanitation environment characteristics, experiencing physical challenges to access or use  
269 a latrine was positively associated with anxiety ( $\beta = 0.4$ ,  $p = .012$ ) (**Table 7**).

270 In the individual city adjusted anxiety models, as with depression, there were negative associations between three  
271 of the sanitation-related empowerment resources (Bodily integrity, Safety and Security, Time) and anxiety (**S12-S14 Tables**).  
272 Bodily Integrity was negatively associated with anxiety in two of the three cities (Saidpur  $\beta = -0.9$ ,  $p < .001$ ; Tiruchirappalli  $\beta =$   
273  $-0.6$ ,  $p = .030$ ). Safety and Security was negatively associated with anxiety in one of the three cities (Tiruchirappalli  $\beta = -0.7$ ,  
274  $p = .001$ ). Time was also negatively associated with anxiety in one city (Saidpur  $\beta = -0.5$ ,  $p = .001$ ). Unlike for well-being or  
275 depression, Privacy was not associated with anxiety in any of the three individual city models.

## 276 **4 Discussion**

277 This study examined relationships between sanitation-related empowerment resources (Bodily Integrity, Safety  
278 and Security, Privacy, and Time) and mental health outcomes (well-being, depression, and anxiety) among women in urban  
279 areas of Bangladesh, India, Senegal, and Uganda. Higher Privacy scores were associated with higher well-being scores  
280 (indicating better subjective mental well-being) and lower depression and anxiety scores (indicating lower frequency of  
281 experiencing symptoms of depression and anxiety). In addition, higher Bodily Integrity scores were associated with lower  
282 depression and anxiety scores. Notably, higher scores for all four sanitation-related resources (Bodily Integrity, Safety and  
283 Security, Privacy, and Time) were associated with lower anxiety scores. There was variation across city models, including  
284 mixed associations between resources and well-being.

285 Our study provides insights into women's mental health in urban areas across multiple LMIC settings. Overall,  
286 while mean well-being scores were moderate and mean depression and anxiety scores were in the normal range, 19% of  
287 women had scores suggesting poor overall well-being, 17% had scores suggesting depression, and 12% had scores  
288 suggesting anxiety. Further, scores varied across cities, with greater proportions of women having scores suggesting poor  
289 mental health in Meherpur, Bangladesh and Tiruchirappalli, India. Globally, depression and anxiety are among the top ten  
290 leading causes of disease burden, and both disorders are 50% more common in women compared to men [38]. Leading



291 mental health experts have called for further understanding of the causes of mental health, and although this study only  
292 looked at associations, our findings suggest that women’s sanitation-related resources may influence their mental health  
293 [38]. Our results provide support for these calls and reinforce the critical need for greater attention to women’s mental  
294 health, particularly in LMIC settings.

295 To our knowledge, this is the first study to examine relationships between sanitation-related Bodily Integrity and  
296 mental health outcomes. Across contexts, we found higher Bodily Integrity scores (women having greater control over their  
297 bodies and ability to access and use their preferred sanitation location) were associated with lower scores for both  
298 depression and anxiety, indicating lower frequency of symptoms of depression and anxiety. We also found sanitation-  
299 related Bodily Integrity to be associated with higher well-being in two cities (Saidpur and Dakar). Aspects of women’s bodily  
300 integrity, like suppressing urination and defecation urges and withholding food and water, have been increasingly discussed  
301 in sanitation research [18]. While these behaviors have been described as a form of bodily control, research demonstrates  
302 that women practice these behaviors to cope with unsupportive physical and social sanitation environments [7, 10, 14, 39-  
303 41]. As such, this exertion of bodily control is likely out of necessity, not preference, and may explain why Bodily Integrity  
304 was found to be associated with anxiety and depression across locations and with general well-being in two. For example,  
305 perceptions of sanitation facility cleanliness, privacy, safety, and adequacy (e.g., disposal bins for menstrual materials) can  
306 motivate suppression and withholding, as can social expectations, like deprioritizing personal needs to meet familial  
307 expectations (e.g., childcare, cooking), or limiting urination and defecation to specific times (e.g., dusk, dawn) to preserve  
308 dignity [10, 42-46]. A forthcoming study with women in Kampala, Uganda and Tiruchirappalli, India found that 93% of  
309 women in both populations reported suppression and 38% in Kampala and 16% in Tiruchirappalli reported withholding food  
310 and water; women’s negative perceptions of Privacy, Safety and Security, and their personal health were all associated with  
311 increased odds of withholding [47]. The link our study found between Bodily Integrity and mental health demonstrates that  
312 an inability to meet needs or be satisfied with sanitation environments are not merely unfortunate inconveniences, but  
313 issues that pose real risks to women that should be addressed.

314 Our finding that higher sanitation-related Privacy scores were associated with higher scores for well-being and  
315 lower scores for depression and anxiety adds to our understanding of the relationship between sanitation-related privacy  
316 and women’s mental health. Notably, we found Privacy scores to be associated with well-being and anxiety scores  
317 regardless of whether women had access to unshared sanitation facilities such as individual household latrines. This result

318 aligns with a systematic review that found an absence of privacy influenced negative well-being and associated dimensions,  
319 like anxiety [13]. Sclar et al., identified that this pattern for privacy existed for women who practiced open defecation and  
320 for those who used unshared latrines, not only highlighting the importance of privacy across sanitation environments but  
321 emphasizing that access to an unshared facility can enable, but does not guarantee, privacy [13]. Our findings show that  
322 privacy is important to mental health, and that sanitation initiatives have an opportunity to improve women's mental  
323 health by enhancing sanitation-related privacy.

324         The observed inverse association between sanitation-related Safety and Security scale scores and anxiety scores  
325 aligns with other research documenting women and girls' fears related to safety and security threats when accessing  
326 sanitation. These included fear of harassment and non-partner physical and sexual violence, especially for those who  
327 practiced open defecation or used sanitation facilities outside the home [18]. These fears were often linked to features of  
328 sanitation facilities or locations such as lighting, lockability, and/or distance, and were especially intense for adolescent girls,  
329 young women, and minorities [8, 9, 14, 15, 18, 44, 48]. These types of fears may provoke anxiety more so than depression  
330 or overall poor well-being, which may explain why we did not observe an association between Safety and Security and the  
331 other two outcomes in our sample. In our study, individual city models indicated that the relationship between Safety and  
332 Security with anxiety was largely driven by the sample from Tiruchirappalli, which aligns with other research from India,  
333 specifically from urban slums in Bhubaneswar where women reported fear of sexual assault when accessing sanitation [14,  
334 44]. Of the three cities in which we measured anxiety (Meherpur, Saidpur, and Tiruchirappalli), the percentage of  
335 respondents who used a shared latrine was highest in Tiruchirappalli, which may further contribute to the observed  
336 association.

337         This study also provides evidence that higher Time scores (indicating greater control over time and labor related to  
338 sanitation) were associated with lower anxiety scores. Studies have documented that women need to spend considerable  
339 time meeting personal sanitation needs, particularly if they need to travel to open defecation fields or shared latrines, as  
340 well as for household sanitation chores and caring for the sanitation needs of dependents [10, 41, 49-52]. Earlier qualitative  
341 research found that women have reported feeling anxiety and worry when they do not have access to latrines, have to  
342 queue at latrines, or have experienced conflict at home for taking too long to meet sanitation needs [14, 53, 54]. Women  
343 have also had to change their time of day for meeting sanitation needs to cope with a lack of privacy, safety, or access [10,

344 14]. The association between Time scores and anxiety scores suggests that time spent on sanitation needs and household  
345 responsibilities can be a burden and negatively affect women’s mental health.

## 346 **4.1 Implications for research and practice**

347 Our findings provide further evidence linking women’s sanitation-related experiences to mental health and is the  
348 latest study to find that access to sanitation infrastructure alone is not enough to meet the needs of women [12, 13, 17]. As  
349 such, sanitation initiatives need to move beyond a narrow focus on feces management and should strive to improve  
350 women’s experiences related to Bodily Integrity, Safety and Security, Privacy, and Time resources. Specifically, sanitation  
351 facilities should be intentionally designed, situated, operated, and maintained to enhance women’s experiences [15, 55, 56].  
352 Existing guidance suggests design elements for female-friendly toilets, including proper lighting, lockable doors, and  
353 disposal bins [55, 56]. Other features like additional stalls in shared latrines to reduce queuing time and enough space for  
354 both women and dependents requiring toileting care, like children, may give women greater control over their time and  
355 labor spent on sanitation [55]. Similarly, guidance exists on gender-inclusive approaches that engage women to provide  
356 feedback and input on where and how facilities should be designed and placed [57]. Previous large-scale efforts that failed  
357 to include women in decision-making, placed household toilets in locations considered unacceptable, not private, and  
358 inconvenient, and so they were not used as a result [58]. Encouragingly, the recently published *Priority Gender-Specific*  
359 *Indicators for WASH Monitoring Under SDG Targets 6.1 and 6.2* recommends a new set of indicators for national and global  
360 monitoring that assess perceptions of cleanliness, privacy, and safety at the individual level [59]. These indicators are meant  
361 to further motivate practitioners and policymakers to consider how they can influence women’s bodily integrity, safety and  
362 security, privacy, and time in sanitation programming.

363 Our study further demonstrates the value of measuring sub-domains of empowerment—in particular, Bodily  
364 Integrity, Safety and Security, Privacy, and Time—as independent constructs, to understand gender-specific experiences  
365 related to sanitation in urban settings. For example, as noted above, in our pooled regression models, Privacy was the only  
366 one of the four sub-domains included in our study that was significantly associated with all three mental health outcomes  
367 (well-being, depression, and anxiety). While scale scores for Privacy were generally high across our study populations in the  
368 five cities, there were still women with privacy concerns. Future research and programs could use the ARISE Privacy scale,  
369 for example, to identify populations (or sub-populations) with lower Privacy scores and target these populations for future

370 privacy-related infrastructural improvements. We recommend using the ARISE scales before sanitation programming begins  
371 to assess baseline needs and to measure changes in women’s mental wellbeing during and after programs end. The ARISE  
372 scales can also be used to examine causal relationships between programs, sub-domains of empowerment, and health and  
373 well-being outcomes for women. While the ARISE scales are designed for urban settings, other validated tools exist for rural  
374 settings, such as the WASH-GEM, which can be used to measure similar constructs [60].

## 375 **4.2 Strengths and limitations**

376 This work contributes to a nascent body of research identifying linkages between sanitation-related experiences  
377 and mental health outcomes. Our study leverages data from urban contexts in four countries, demonstrating that  
378 relationships between sanitation-related resources and mental well-being are not limited to specific contexts or settings. In  
379 addition, the research uses measures of sanitation-related empowerment that have been developed and rigorously  
380 validated for use across urban contexts in Africa and South Asia, allowing for the consistent measurement of sub-domains  
381 of empowerment across populations.

382 This study also has several limitations, which should be considered when interpreting the results. Our sample did  
383 not include non-binary or transgender populations, as well as women sanitation workers, who have different sanitation and  
384 mental health experiences [61-63]. Our analysis did not include several variables that may be associated with mental health,  
385 such as wealth or housing quality [64]. While we were not able to control for wealth and assets in our models, we included  
386 a variable for highest completed education in our analysis, as more years of education have been shown to have a  
387 protective effect on mortality across economic contexts [37]. Additionally, we note that mental health measures have been  
388 predominantly developed based on Western medicine-derived constructs [65, 66]. Our assessments of well-being,  
389 depression, and anxiety were not based on local perceptions of these outcomes; rather, we used the previously validated  
390 WHO-5, PHQ-2, and GAD-2 measures.

## 391 **5 Conclusion**

392 Overall, our findings support existing calls for a more comprehensive view of sanitation, which considers the  
393 intersectional needs of women. Our results demonstrate important linkages between women’s sanitation-related resources  
394 of Bodily Integrity, Safety and Security, Privacy, and Time and mental health. Thus, sanitation infrastructure should include

395 features to improve women’s bodily integrity, safety and security, privacy, and control over time. Evaluations of sanitation  
396 interventions, programs, and environments should incorporate assessments of sanitation-related resources and mental  
397 health outcomes for comprehensive assessments of impact beyond mere infrastructure availability. Sanitation-users’  
398 perceptions of their resources are crucial, particularly for women. It is important to center their experiences in intervention  
399 design and policymaking to ensure that sanitation investments contribute to – and do not detract from – overall well-being.  
400

## 401 **Acknowledgements**

402           We are grateful to Deepa Karthykeyan, Kun Zhang, Arjun Sharma, and Josephine Goma of Athena Infonomics;  
403 Shravya Narakula, Thejasweeni Bingisetty, and Vimalan Karunakaran of Civic Fulcrum; Catherine Mwanje of CME Solutions;  
404 Amadou Ba of People and Data; Alauddin Ahmed, Makfe Farah, Rakib Uddin Ahmed, and Samina of ITN-BUET; Kazi Amin of  
405 WaterAid Bangladesh; Tahmid Hossain of Practical Action; and Shaila Shahid of the Department of Public Health  
406 Engineering of the Bangladesh government for support, coordination, and supervision of study activities. We extend our  
407 gratitude to all members of the data collection teams in each city. We are also grateful to the Citywide Inclusive Sanitation  
408 (CWIS) partners for their input and support, especially Allan Nkurunziza and Hilda Sande Kwesiga of Kampala Capital City  
409 Authority. We are grateful to all study participants for sharing their time and contributing to the research.

410

## 411 **References**

- 412 1. Guidelines on sanitation and health. Geneva: World Health Organization, 2018.
- 413 2. United Nations General Assembly. Resolution adopted by the General Assembly on 17 December 2015: The human  
414 rights to safe drinking water and sanitation. 2015.
- 415 3. Progress on household drinking water, sanitation and hygiene 2000-2022: special focus on gender. New York:  
416 United Nations Children's Fund (UNICEF) and World Health Organization (WHO), 2023.
- 417 4. Freeman MC, Garn JV, Sclar GD, Boisson S, Medlicott K, Alexander KT, et al. The impact of sanitation on infectious  
418 disease and nutritional status: A systematic review and meta-analysis. *Int J Hyg Environ Health*. 2017;220(6):928-49.
- 419 5. Wolf J, Hubbard S, Brauer M, Ambelu A, Arnold BF, Bain R, et al. Effectiveness of interventions to improve drinking  
420 water, sanitation, and handwashing with soap on risk of diarrhoeal disease in children in low-income and middle-income  
421 settings: a systematic review and meta-analysis. *Lancet*. 2022;400(10345):48-59.
- 422 6. Benova L, Cumming O, Campbell OM. Systematic review and meta-analysis: association between water and  
423 sanitation environment and maternal mortality. *Trop Med Int Health*. 2014;19(4):368-87.
- 424 7. Kulkarni S, O'Reilly K, Bhat S. No relief: lived experiences of inadequate sanitation access of poor urban women in  
425 India. *Gend Dev*. 2017;25(2):167-83.
- 426 8. Jadhav A, Weitzman A, Smith-Greenaway E. Household sanitation facilities and women's risk of non-partner sexual  
427 violence in India. *BMC Public Health*. 2016;16(1):1139.
- 428 9. Winter SC, Barchi F. Access to sanitation and violence against women: evidence from Demographic Health Survey  
429 (DHS) data in Kenya. *Int J Environ Res Public Health*. 2016;26(3):291-305.
- 430 10. Caruso BA, Clasen TF, Hadley C, Yount KM, Haardörfer R, Rout M, et al. Understanding and defining sanitation  
431 insecurity: women's gendered experiences of urination, defecation and menstruation in rural Odisha, India. *BMJ Glob  
432 Health*. 2017;2(4):e000414.
- 433 11. Goddard S, Sommer M. Menstrual health and hygiene management and Water, Sanitation and Hygiene (WASH) in  
434 urban slums: Gaps in the evidence and recommendations. *J Gend Water*. 2020;7(1).

- 435 12. Wolf J, Johnston RB, Ambelu A, Arnold BF, Bain R, Brauer M, et al. Burden of disease attributable to unsafe drinking  
436 water, sanitation, and hygiene in domestic settings: a global analysis for selected adverse health outcomes. *Lancet*.  
437 2023;401(10393):2060 - 71.
- 438 13. Sclar GD, Penakalapati G, Caruso BA, Rehfuess EA, Garn JV, Alexander KT, et al. Exploring the relationship between  
439 sanitation and mental and social well-being: A systematic review and qualitative synthesis. *Soc Sci Med*. 2018;217:121-34.  
440 Epub 2018/10/14. doi: 10.1016/j.socscimed.2018.09.016. PubMed PMID: 30316053.
- 441 14. Sahoo KC, Hulland KR, Caruso BA, Swain R, Freeman MC, Panigrahi P, et al. Sanitation-related psychosocial stress: a  
442 grounded theory study of women across the life-course in Odisha, India. *Soc Sci Med*. 2015.
- 443 15. Shiras T, Cumming O, Brown J, Muneme B, Nala R, Dreibelbis R. Shared latrines in Maputo, Mozambique: exploring  
444 emotional well-being and psychosocial stress. *BMC Int Health Hum R*. 2018;18. doi: 10.1186/s12914-018-0169-z. PubMed  
445 PMID: WOS:000439937600001.
- 446 16. Bisung E, Elliott SJ. Psychosocial impacts of the lack of access to water and sanitation in low-and middle-income  
447 countries: a scoping review. *J Water Health*. 2017;15(1):17-30. doi: 10.2166/wh.2016.158. PubMed PMID:  
448 WOS:000394230100002.
- 449 17. Caruso BA, Cooper HLF, Haardorfer R, Yount KM, Routray P, Torondel B, et al. The association between women's  
450 sanitation experiences and mental health: A cross-sectional study in Rural, Odisha India. *SSM Popul Health*. 2018;5:257-66.  
451 Epub 2018/08/11. doi: 10.1016/j.ssmph.2018.06.005. PubMed PMID: 30094321; PubMed Central PMCID: PMC6077264.
- 452 18. Caruso BA, Conrad A, Patrick M, Owens A, Kviton K, Zarella O, et al. Water, sanitation, and women's  
453 empowerment: A systematic review and qualitative metasynthesis. *PLOS Water*. 2022;1(6):e0000026.
- 454 19. Kabeer N. Resources, agency, achievements: Reflections on the measurement of women's empowerment. *Dev*  
455 *Change*. 1999;30(3):435-64.
- 456 20. van Eerdewijk A, Wong F, Vaast C, Newton J, Tyszler M, Pennington A. White paper: A conceptual model of women  
457 and girls' empowerment. Amsterdam Royal Tropical Institute (KIT, 2017).
- 458 21. Hirve S, Lele P, Sundaram N, Chavan U, Weiss M, Steinmann P, et al. Psychosocial stress associated with sanitation  
459 practices: experiences of women in a rural community in India. *J Water Sanit Hyg Dev*. 2015;5(1):115-26.
- 460 22. MacRae ER, Clasen T, Dasmohapatra M, Caruso BA. 'It's like a burden on the head': Redefining adequate menstrual  
461 hygiene management throughout women's varied life stages in Odisha, India. *PLoS One*. 2019;14(8):e0220114.



- 462 23. Bisung E, Elliott SJ. 'Everyone is exhausted and frustrated': exploring psychosocial impacts of the lack of access to  
463 safe water and adequate sanitation in Usoma, Kenya. *J Water Sanit Hyg Dev.* 2016:washdev2016122.
- 464 24. Winter SC, Obara LM, Barchi F. Environmental correlates of health-related quality of life among women living in  
465 informal settlements in Kenya. *Int J Environ Res Public Health.* 2019;16(20). doi: 10.3390/ijerph16203948. PubMed PMID:  
466 WOS:000494779100162.
- 467 25. Sinharoy SS, Conrad A, Patrick M, McManus S, Caruso BA. Protocol for development and validation of instruments  
468 to measure women's empowerment in urban sanitation across countries in South Asia and Sub-Saharan Africa: the Agency,  
469 Resources and Institutional Structures for Sanitation-related Empowerment (ARISE) scales. *BMJ Open.* 2022;12(2):e053104.
- 470 26. Sinharoy S, Xia D, Patrick M, McManus S, Chipungu J, Reddy M, et al. The Agency, Resources, and Institutional  
471 Structures for Sanitation-related Empowerment (ARISE) scales: Psychometric evaluation across Asia and Africa. Preprint  
472 (version 1). 2024. doi: <https://doi.org/10.21203/rs.3.rs-4571408/v1>.
- 473 27. World Health Organization. The World Health Organization-Five Well-being index (WHO-5). Geneva: World Health  
474 Organization, 2024.
- 475 28. Kroenke K, Spitzer RL, Williams JBW. The Patient Health Questionnaire-2 - Validity of a two-item depression  
476 screener. *Med Care.* 2003;41(11):1284-92. doi: 10.1097/01.Mlr.0000093487.78664.3c. PubMed PMID:  
477 WOS:000186270500008.
- 478 29. Kroenke K, Spitzer RL, Williams JBW, Monahan PO, Löwe B. Anxiety disorders in primary care:: Prevalence,  
479 impairment, comorbidity, and detection. *Ann Intern Med.* 2007;146(5):317-25. doi: 10.7326/0003-4819-146-5-200703060-  
480 00004. PubMed PMID: WOS:000244829600001.
- 481 30. Plummer F, Manea L, Trepel D, McMillan D. Screening for anxiety disorders with the GAD-7 and GAD-2: a  
482 systematic review and diagnostic metaanalysis. *Gen Hosp Psychiatry.* 2016;39:24-31. doi:  
483 10.1016/j.genhosppsy.2015.11.005. PubMed PMID: WOS:000371244000004.
- 484 31. Sinharoy SS, McManus S, Patrick M, Mink T, Xia D, McKinley N, et al. The Agency Resources, and Institutional  
485 Structures for Sanitation-Related Empowerment (ARISE) scales: User guide. 2023.
- 486 32. Parakh P. Gender issues in life event research in India: A critical appraisal of the presumptive stressful life events  
487 scale. *Asian journal of psychiatry.* 2011;4(1):19-21. doi: 10.1016/j.ajp.2011.01.001. PubMed PMID: 23050909.

- 488 33. Zimet GD, Dahlem NW, Zimet SG, Farley GK. The multidimensional scale of perceived social support. *J Pers Assess.*  
489 1988;52(1):30-41.
- 490 34. Mohanty J, Ahn J, Chokkanathan S. Adoption disclosure: experiences of Indian domestic adoptive parents. *Child*  
491 *Fam Soc Work.* 2014.
- 492 35. Pilkonis P, Yu L, Dodds N, Johnston K, Maihoefer C, Lawrence S. Validation of the depression item bank from the  
493 Patient-Reported Outcomes Measurement Information System (PROMIS®) in a three-month observational study. *J Psychiatr*  
494 *Res.* 2014;56:112-9. doi: doi:10.1016/j.jpsychires.2014.05.010.
- 495 36. Sinharoy SS, Chery L, Patrick M, Conrad A, Ramaswamy A, Stephen A, et al. Prevalence of heavy menstrual bleeding  
496 and associations with physical health and wellbeing in low-income and middle-income countries: a multinational cross-  
497 sectional study. *Lancet Glob Health.* 2023;11(11):E1775-E84. doi: 10.1016/s2214-109x(23)00416-3. PubMed PMID:  
498 WOS:001104130000001.
- 499 37. Balaj M, Henson CA, Aronsson A, Aravkin A, Beck K, Degail C, et al. Effects of education on adult mortality: a global  
500 systematic review and meta-analysis. *Lancet Public Health.* 2024;9(3):e155-e65. doi: 10.1016/s2468-2667(23)00306-7.  
501 PubMed PMID: WOS:001208538500001.
- 502 38. GBD 2019 Mental Disorders Collaborators. Global, regional, and national burden of 12 mental disorders in 204  
503 countries and territories, 1990–2019: a systematic analysis for the Global Burden of Disease Study 2019. *Lancet Psychiatry.*  
504 2022;9(2):137-50.
- 505 39. Panchang SV, Joshi P, Kale S. Women ‘holding it’ in urban India: Toilet avoidance as an under-recognized health  
506 outcome of sanitation insecurity. *Glob Public Health.* 2021:1-14.
- 507 40. Pouramin P, Nagabhatla N, Miletto M. A systematic review of water and gender interlinkages: Assessing the  
508 intersection with health. *Front Water.* 2020;2:6.
- 509 41. Khanna T, Das M. Why gender matters in the solution towards safe sanitation? Reflections from rural India. *Glob*  
510 *Public Health.* 2016;11(10):1185-201. doi: 10.1080/17441692.2015.1062905. PubMed PMID: WOS:000386829000001.
- 511 42. Routray P, Schmidt W-P, Boisson S, Clasen T, Jenkins MW. Socio-cultural and behavioural factors constraining  
512 latrine adoption in rural coastal Odisha: an exploratory qualitative study. *BMC Public Health.* 2015;15(1):880.

- 513 43. Bhatt N, Budhathoki SS, Lucero-Prisno DEI, Shrestha G, Bhattachan M, Thapa J, et al. What motivates open  
514 defecation? A qualitative study from a rural setting in Nepal. *PLoS One*. 2019;14(7). doi: 10.1371/journal.pone.0219246.  
515 PubMed PMID: WOS:000484918700047.
- 516 44. Hulland KR, Chase RP, Caruso BA, Swain R, Biswal B, Sahoo KC, et al. Sanitation, stress, and life stage: A systematic  
517 data collection study among women in Odisha, India. *PLoS One*. 2015;10(11):e0141883.
- 518 45. Winter S, Barchi F, Dzombo MN. Drivers of women's sanitation practices in informal settlements in sub-Saharan  
519 Africa: a qualitative study in Mathare Valley, Kenya. *Int J Environ Health Res*. 2018;28(6):609-25. doi:  
520 10.1080/09603123.2018.1497778. PubMed PMID: WOS:000445651200004.
- 521 46. Datta A, Ahmed N. Intimate infrastructures: The rubrics of gendered safety and urban violence in Kerala, India.  
522 *Geoforum*. 2020;110:67-76. doi: 10.1016/j.geoforum.2020.01.016. PubMed PMID: WOS:000521513400007.
- 523 47. Sinclair E, Hüls, A., Patrick, M., Arun, S., Ramanarayanan, V., Sinharoy, S. S., Caruso, B. A. Association of privacy,  
524 safety and security, and health with sanitation-related withholding and suppression among women in urban Uganda and  
525 India (Forthcoming).
- 526 48. Corburn J, Hildebrand C. Slum sanitation and the social determinants of women's health in Nairobi, Kenya. *J*  
527 *Environ Public Health*. 2015;2015:209505. doi: 10.1155/2015/209505. PubMed PMID: MEDLINE:26060499.
- 528 49. Scott K, George AS, Harvey SA, Mondal S, Patel G, Ved R, et al. Beyond form and functioning: Understanding how  
529 contextual factors influence village health committees in northern India. *Figshare*; 2017.
- 530 50. Baker KK, Padhi B, Torondel B, Das P, Dutta A, Sahoo KC, et al. From menarche to menopause: A population-based  
531 assessment of water, sanitation, and hygiene risk factors for reproductive tract infection symptoms over life stages in rural  
532 girls and women in India. *PLoS One*. 2017;12(12). doi: 10.1371/journal.pone.0188234. PubMed PMID:  
533 WOS:000417110700010.
- 534 51. Winter S, Dreibelbis R, Barchi F. Women's sanitation practices in informal settlements: A multi-level analysis of  
535 factors influencing utilisation in Nairobi, Kenya. *Glob Public Health*. 2019;14(5):663-74. doi:  
536 10.1080/17441692.2018.1534256. PubMed PMID: WOS:000461065000005.
- 537 52. Gonsalves GS, Kaplan EH, Paltiel AD. Reducing sexual violence by increasing the supply of toilets in Khayelitsha,  
538 South Africa: A mathematical model. *PLoS One*. 2015;10(4). doi: 10.1371/journal.pone.0122244. PubMed PMID:  
539 WOS:000353711600011.

- 540 53. Bapat M, Agarwal I. Our needs, our priorities; women and men from the slums in Mumbai and Pune talk about  
541 their needs for water and sanitation. *Environment and Urbanization*. 2003;15(2):71-86.
- 542 54. Babbar K, Das U, Ashraf S, Shpenev A, Bicchieri C. Unlocking the role of social norms: How they shape women's  
543 public toilet usage in India. *American Journal of Tropical Medicine and Hygiene*. 2023;109(5):1177-86. doi:  
544 10.4269/ajtmh.23-0220. PubMed PMID: WOS:001130915100023.
- 545 55. Schmitt ML, Clatworthy D, Ogello T, Sommer M. Making the case for a female-friendly toilet. *Water*. 2018;10(9).  
546 doi: ARTN 1193  
547 10.3390/w10091193. PubMed PMID: WOS:000448821900085.
- 548 56. USAID W, WSUP. Female-friendly public and community toilets: a guide for planners and decision makers. London,  
549 UK: WaterAid, 2018.
- 550 57. Spasojevic D, Batagol B, Prescott M, Nasir S, Mansfield R, Rahlina I, et al. Reflecting on water and sanitation  
551 infrastructure: A toolkit for WASH practitioners on gender and socially inclusive participatory design approaches in urban  
552 informal settlements. . 2022.
- 553 58. Routray P, Torondel B, Clasen T, Schmidt W-P. Women's role in sanitation decision making in rural coastal Odisha,  
554 India. *PLoS One*. 2017;12(5):e0178042.
- 555 59. Caruso BA, Chipungu J, Hennegan J, Motivans A, Pandolfelli L, Patrick M, et al. Priority gender-specific indicators  
556 for WASH monitoring under SDG targets 6.1 and 6.2: Recommendations for national and global monitoring. 2024.
- 557 60. MacArthur J, Chase RP, Gonzalez D, Kozole T, Nicolettil C, Toeur V, et al. Investigating impacts of gender-  
558 transformative interventions in water, sanitation, and hygiene: Structural validity, internal reliability and measurement  
559 invariance of the water, sanitation, and hygiene–Gender equality measure (WASHGEM). *PLOS Water*. 2024;3(10). doi:  
560 <https://doi.org/10.1371/journal.pwat.0000233>.
- 561 61. Dubey P, Muthusamy S, Watkins SL, Baker KK, Story WT, Afifi RA. A qualitative inquiry into the lived experiences of  
562 menstrual health and hygiene in the transgender and non-binary people in urban areas of India. *Int J Transgend Health*.  
563 2024. doi: 10.1080/26895269.2024.2362915. PubMed PMID: WOS:001241976500001.

- 564 62. Defreyne J, Motmans J, T'Sjoen G. Healthcare costs and quality of life outcomes following gender affirming surgery  
565 in trans men: a review. *Expert Rev Pharmacoecon Outcomes Res.* 2017;17(6):543-56. doi: 10.1080/14737167.2017.1388164.  
566 PubMed PMID: WOS:000415840300005.
- 567 63. Monteiro TS, Nalini R. Mental health at the intersections of marginalization: A conceptual model to explore the  
568 mental health concerns of women sanitation workers in India. *Asian Soc Work Policy Rev.* 2021;15(2):102-11. doi:  
569 10.1111/aswp.12223. PubMed PMID: WOS:000618191700001.
- 570 64. Lund C, Breen A, Flisher AJ, Kakuma R, Corrigall J, Joska JA, et al. Poverty and common mental disorders in low and  
571 middle income countries: A systematic review. *Soc Sci Med.* 2010;71(3):517-28. doi: 10.1016/j.socscimed.2010.04.027.  
572 PubMed PMID: WOS:000280120100013.
- 573 65. Kleinman A. *Rethinking Psychiatry: From Cultural Category to Personal Experience.* New York: MacMillan  
574 Publishing Co.; 1988. 256 p.
- 575 66. Lavender H, Khondoker A, Jones R. Understandings of depression: an interview study of Yoruba, Bangladeshi and  
576 White British people. *Fam Pract.* 2006;23(6):651-8. doi: doi:10.1093/fampra/cml043.

577

578 **Supporting information captions**

579 S1 - S14 Tables

## 1.a Well-being scores (WHO-5)

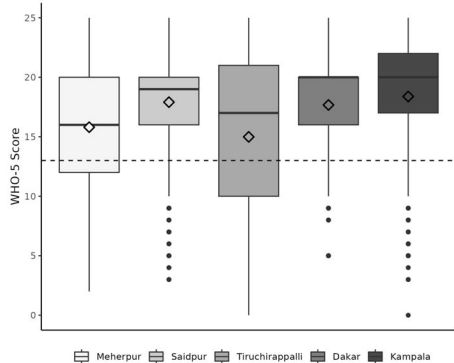

Maximum score

Quartile

Median

Quartile

Minimum score

Mean

----- Threshold

## 1.b Depression scores (PHQ-2)

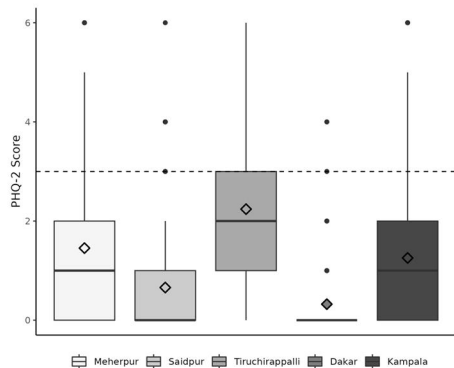

## 1.c Anxiety scores (GAD-2)

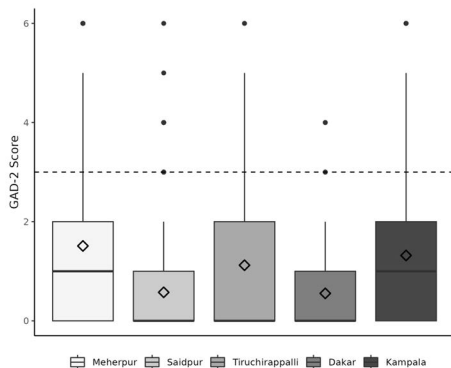

Source: https://medrxiv.org/content/medrxiv/early/2025/01/14/2025.01.08.25320223.full.pdf
